# Supplementary material
Source: publisher figshare collection journal article supplement (https://gsapubs.figshare.com/articles/dataset/_/12534365)
Supplement: Supplementary file 1 [file 1]

## SUPPLEMENTAL TABLE CAPTIONS

Table DR1 - Survey of publications listed by the Paleobiology Database (PBDB), covering all papers to which we had access published in the last ca 5 years, plus a small number randomly chosen from earlier years. For each paper, we indicate the fossil group(s) studied; whether species, genus or higher level taxa were analyzed; the reasons given by the authors (if any - only about half the papers did) as to why genus or higher taxon ranks were used; and if the study included primary biodiversity analyses of multiple samples. Various types of concerns expressed about the quality of available species data (identifications, completeness, and similar) are combined and recorded as 'data quality'. The only other explanation given was simply that the use of genera was 'standard practice' (alternately expressed as following previous studies), without further justification.

Table DR2 - Species: genus ratios for a selection of modern groups of organisms, chosen at random from available literature but covering all major clades other than prokaryotes.

Table DR3 - Pearson's  $r$  and Spearman's  $\rho$  correlation coefficients and probability values  $p$  for raw and linearly detrended Cenozoic time series of diatom species and genus diversity, oxygen and carbon deep-sea stable isotopes.

Table DR2

| Group                              | Ngenera living | Nsp living | sp-g ratio | source                                                                                                                                                                                                                                                    |
|------------------------------------|----------------|------------|------------|-----------------------------------------------------------------------------------------------------------------------------------------------------------------------------------------------------------------------------------------------------------|
| Mammals                            | 1229           |            | 5488       | 4.5 IUCN redlist                                                                                                                                                                                                                                          |
| Birds                              | 2289           |            | 10719      | 4.7 IOC WORLD BIRD LIST (6.2) <a href="http://dx.doi.org/10.14344/IOC.ML.6.2">http://dx.doi.org/10.14344/IOC.ML.6.2</a>                                                                                                                                   |
| Reptiles                           | 1131           |            | 9546       | 8.4 Pincheira-Donoso 2013 PLoSOne                                                                                                                                                                                                                         |
| Amphibians                         | 504            |            | 6807       | 13.5 Pyron & Wiens, 2011 Molecular Phylogenetics and Evolution                                                                                                                                                                                            |
| Hemichordates                      | 18             |            | 108        | 6.0 Cameron, 2008 A comprehensive list of extant Hemichordata with links to images                                                                                                                                                                        |
| Ophiuroid echinoderms              | 334            |            | 2140       | 6.4 WoRMS. Includes a few subspecies.                                                                                                                                                                                                                     |
| Decapod crustaceans                | 2100           |            | 14756      | 7.0 DeGrave 2009 Raffles Bull. Zool. Genus estimate from total genera x % living vs only fossil families                                                                                                                                                  |
| Shallow water bivalves             | 769            |            | 5428       | 7.1 Krug et al., 2016 Proc. R. Soc. B                                                                                                                                                                                                                     |
| Chilopoda (centipedes)             | 429            |            | 3149       | 7.3 Bonato et al., 2006 <i>Chilobase: a web</i> resource for Chilopoda taxonomy                                                                                                                                                                           |
| Polychaeta                         | 1093           |            | 8350       | 7.6 <a href="https://www.environment.gov.au/system/files/pages/2ee3f4a1-f130-465b-9c7a-79373680a067/files/nlsaw-2nd-complete.pdf">https://www.environment.gov.au/system/files/pages/2ee3f4a1-f130-465b-9c7a-79373680a067/files/nlsaw-2nd-complete.pdf</a> |
| Stylasteridae (Cnidaria: Hydrozoa) | 26             |            | 247        | 9.5 Cairns, 2011 PloSOne                                                                                                                                                                                                                                  |
| Acanthaceae (flowering plants)     | 225            |            | 2955       | 13.1 theplantlist.org (Kew, Mis.Bot.Gard etc collaboration)                                                                                                                                                                                               |
| Pteridophytes (ferns)              | 568            |            | 13000      | 22.9 theplantlist.org (Kew, Mis.Bot.Gard etc collaboration)                                                                                                                                                                                               |
| Agaricaceae (mushrooms)            | 85             |            | 1340       | 15.8 Kirk et al. 2008 Dictionary of the Fungi                                                                                                                                                                                                             |
| Boletaceae (mushrooms)             | 35             |            | 787        | 22.5 Kirk et al. 2008 Dictionary of the Fungi                                                                                                                                                                                                             |
| Diatoms                            | 1000           |            | 12000      | 12.0 see '*' note below                                                                                                                                                                                                                                   |

\* - Estimate is for all diatoms but fresh-water genera likely to have much higher sp:genus ratios due to endemism, vs pelagic marine. min estimate of sp-g ratio from described species only; Vanormelingen 2008 BiodivCons - 'lump' type morphospecies estimate, ca 10k described (Guiry 2012 JPhycol gives 8.3k in Algaebase; Mann&Vanormelingen 2013 JEukMicBio give 13k described, minimum of 30k species). Hires morphologic/molecular probably ca 100k species.

Cairns, S.D., 2011, Global Diversity of the Stylasteridae (Cnidaria: Hydrozoa: Athecatae): PLOS One, v. 6, p. 1-13  
Cameron, C.B., 2008, A comprehensive list of extant Hemichordata with links to images: <https://www.webdepot.umontreal.ca/Usagers/cameroc/MonDepotPublic/Cameron/Species.html>  
Krug, A.Z., Jablonski, D., Valentine, J.W., 2008, Species-genus ratios reflect a global history of diversification and range expansion in marine bivalves: Proc. R. Soc. B, v. 275, p. 1117-1123  
Pincheira-Donoso, D., Bauer, A.M., Meiri, S., Uetz, P., 2013, Global Taxonomic Diversity of Living Reptiles: PLOS One, v. 8, p. 1-10

Pyron, R.A., Wiens, J.J., 2011, A large-scale phylogeny of Amphibia including over 2800 species, and a revised classification of extant frogs, salamanders, and caecilians: Molecular Phylogenetics and Evolution, v. 61, p. 543-583

Table DR3

|                                                                     | Species diversity |              | Genus diversity |              |
|---------------------------------------------------------------------|-------------------|--------------|-----------------|--------------|
|                                                                     | Pearson's r       | p-value      | Pearson's r     | p-value      |
| <b><math>\delta^{18}\text{O}</math> (Zachos <i>et al.</i> 2008)</b> | 0.928             | <2E-16 ***   | 0.528           | 6.90E-05 *** |
| detrended                                                           | 0.633             | 6.30E-07 *** | -0.101          | 0.479        |
| <b><math>\delta^{13}\text{C}</math> (Zachos <i>et al.</i> 2008)</b> | -0.553            | 2.53E-05 *** | -0.243          | 0.085        |
| detrended                                                           | -0.304            | 0.03 *       | 0.08            | 0.578        |
| <b>Genus diversity</b>                                              | 0.599             | 8.65E-07 *** |                 |              |
| detrended                                                           | 0.068             | 0.615        |                 |              |

\*\*\* p < 0.001    \*\* 0.001 < p < 0.01    \* 0.01 < p < 0.05

|                                                                     | Species diversity |              | Genus diversity |          |
|---------------------------------------------------------------------|-------------------|--------------|-----------------|----------|
|                                                                     | Spearman's rho    | p-value      | Spearman's rho  | p-value  |
| <b><math>\delta^{18}\text{O}</math> (Zachos <i>et al.</i> 2008)</b> | 0.914             | <2E-16 ***   | 0.439           | 0.001 ** |
| detrended                                                           | 0.617             | 2.53E-06 *** | -0.043          | 0.762    |
| <b><math>\delta^{13}\text{C}</math> (Zachos <i>et al.</i> 2008)</b> | -0.306            | 0.03 *       | -0.066          | 0.6433   |
| detrended                                                           | -0.278            | 0.048 *      | 0.103           | 0.4717   |
| <b>Genus diversity</b>                                              | 0.539             | 5.84E-05 *** |                 |          |
| detrended                                                           | 0.013             | 0.9272       |                 |          |

\*\*\* p < 0.001    \*\* 0.001 < p < 0.01    \* 0.01 < p < 0.05
